# Supplementary material for: Effect of the Novel Coronavirus Pneumonia Pandemic on Medical Students’ Psychological Stress and Its Influencing Factors
Source: PubMed Central journal article supplement (PMC7591817; doi:10.3389/fpsyg.2020.548506), 2020-10-14
Supplement: Data_Sheet_1.pdf [file Data_Sheet_1.pdf]

**Supplemental FigureS1: the design flowchart of present study**

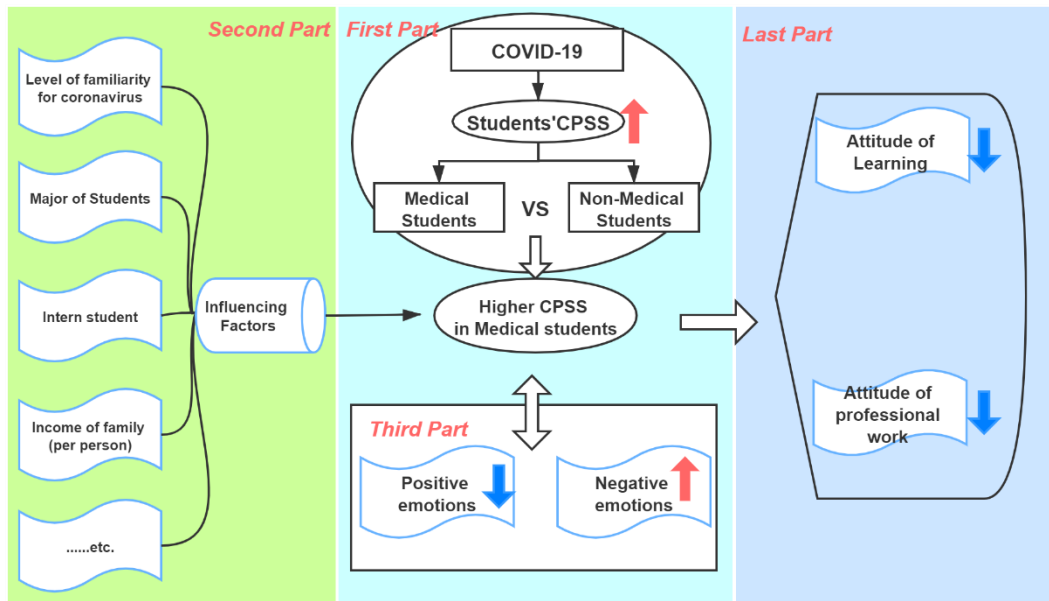

Figure legend: The design flowchart of present study. First, the differences of CPSS score between medical and non-medical students. Second, the influencing factors significantly related to high CPSS score. Third, the relationship of stress with negative psychologies and positive psychologies in the medical students. Last, the influences of high CPSS scores on medical students on the attitudes of learning and professional work.

**Supplemental TableS1: The distribution of CPSS in each province of China for the college students during the novel coronavirus pneumonia pandemic**

| Provinces    | All students |         |        | Medical students |         |        |
|--------------|--------------|---------|--------|------------------|---------|--------|
|              | CPSS score   | SD      | Number | CPSS score       | SD      | Number |
| Anhui        | 21.490       | 7.6489  | 49     | 24.208           | 6.4470  | 24     |
| Beijing      | 25.750       | 4.3493  | 4      | 26.333           | 5.1316  | 3      |
| Fujian       | 23.238       | 6.9831  | 2361   | 23.700           | 6.7638  | 1517   |
| Gansu        | 24.065       | 5.9068  | 124    | 24.259           | 5.9740  | 112    |
| Guangdong    | 23.098       | 8.2250  | 51     | 22.556           | 7.5056  | 27     |
| Guangxi      | 23.500       | 6.8087  | 40     | 23.905           | 6.8986  | 21     |
| Guizhou      | 24.855       | 6.2221  | 69     | 25.518           | 5.5759  | 56     |
| Hainan       | 26.105       | 4.0946  | 19     | 25.636           | 4.2725  | 11     |
| Hebei        | 25.073       | 6.7630  | 437    | 25.086           | 6.8599  | 348    |
| Henan        | 21.436       | 5.8902  | 55     | 22.333           | 6.2670  | 24     |
| Heilongjiang | 27.143       | 7.5151  | 7      | 25.500           | 6.7157  | 6      |
| Hubei        | 26.455       | 6.4554  | 11     | 21.800           | 6.9065  | 5      |
| Hunan        | 24.478       | 7.5189  | 23     | 25.438           | 7.5716  | 16     |
| Jilin        | 18.400       | 11.1490 | 5      | 18.333           | 12.5831 | 3      |
| Jiangsu      | 23.967       | 7.3686  | 92     | 23.989           | 7.4253  | 90     |
| Jiangxi      | 22.511       | 5.9682  | 45     | 24.105           | 4.7010  | 19     |
| Liaoning     | 23.222       | 9.6667  | 9      | 20.750           | 6.6279  | 8      |
| Neimenggu    | 20.333       | .5774   | 3      | 20.333           | .5774   | 3      |
| Ningxia      | 21.800       | 5.4955  | 5      | 21.000           | 7.5498  | 3      |
| Qinghai      | 27.571       | 5.0796  | 14     | 27.308           | 5.1863  | 13     |
| Shandong     | 26.769       | 6.7596  | 13     | 27.889           | 7.0257  | 9      |
| Shanxi#      | 24.018       | 6.5870  | 55     | 24.224           | 6.5328  | 49     |
| Shaanxi#     | 23.800       | 7.3881  | 25     | 26.333           | 6.6583  | 3      |
| Shanghai     | 27.333       | 1.5275  | 3      | 26.000           |         | 1      |
| Sichuan      | 25.644       | 8.3996  | 45     | 27.226           | 8.1023  | 31     |
| Tianjin      | 23.512       | 6.8159  | 41     | 23.667           | 6.9484  | 39     |
| Xizang       | 27.400       | 2.3022  | 5      | 27.400           | 2.3022  | 5      |
| Xinjiang     | 26.400       | 2.8810  | 5      | 26.400           | 2.8810  | 5      |
| Yunan        | 26.750       | 8.6288  | 24     | 26.696           | 8.8185  | 23     |
| Zhejiang     | 27.800       | 11.6570 | 15     | 30.100           | 12.7667 | 10     |
| Chongqing    | 26.238       | 7.0349  | 21     | 28.214           | 6.8520  | 14     |
| Total        | 23.655       | 6.9999  | 3675   | 24.137           | 6.8251  | 2498   |

# Shanxi or Shaanxi were the two different pronunciations in two provinces in China
